# Supplementary material for: COVID-19 Lockdown and Changes in Dietary and Lifestyle Behaviors in a French Longitudinal Cohort
Source: MDPI journal article supplement (doi:10.3390/nu15214682), 2023-11-04
Supplement: s1 [file s1]

| Authors                  | Design           | Sample | Age                                                              | Zone           | Gender             | Period                                     | Changes in PA (%)  |                    |                    | Changes in BW (%)  |                    |                    | Changes in food consumption (%)                                                                                                                                              |                    |                    | Mental health                                                                                       |
|--------------------------|------------------|--------|------------------------------------------------------------------|----------------|--------------------|--------------------------------------------|--------------------|--------------------|--------------------|--------------------|--------------------|--------------------|------------------------------------------------------------------------------------------------------------------------------------------------------------------------------|--------------------|--------------------|-----------------------------------------------------------------------------------------------------|
|                          |                  | n      | years                                                            |                |                    | %                                          | Decreased          | Unchanged          | Increased          | Decreased          | Unchanged          | Increased          | Decreased                                                                                                                                                                    | Unchanged          | Increased          |                                                                                                     |
| Cheikh Ismail et al.     | Cross-sectional  | 1012   | 18-35 : 56.8%<br>>35 : 53.2%                                     | UAE            | M: 24<br>F: 76     | Between April and May 2020                 | 41.9               | 43.3               | 14.8               | 21                 | 48                 | 31                 | The percentage of participants consuming breakfast increased from 66% to 74.2%. and the percentage of those skipping meals decreased from 64.5% to 46.2% during the pandemic |                    |                    | During vs pre 14.1% vs. 6.3% for all the time emotional exhaustion; 13.5% vs. 6.9% for irritability |
| Deschasaux et al.        | Longitudinal     | 37752  | 52 (16.6)                                                        | France         | M: 48<br>F: 52     | Early april - May 2020                     | 52.8               | 28.5               | 18.7               | 23                 | 42                 | 35                 | 33                                                                                                                                                                           | 42                 | 25                 | 10.8% reported modified eating practices (eating more) due to more anxiety                          |
| Giacalone et al.         | Cross-sectional  | 2642   | 18-35: 35.3%<br>36-50: 37.2%<br>51-65: 23.5%<br>65+ 4%           | Danish adults  | M: 29<br>F: 71     | From 24 April to 5 May 2020                | 48.8               | 21.5               | 29.7               | 49.4               |                    | 28.4               | 57.2                                                                                                                                                                         |                    | 42.8               | –                                                                                                   |
| Huber et al.             | Cross-sectional  | 1964   | 23 ± 4                                                           | Bavarian unis. | M: 28.5<br>F: 71.5 | Active for 2 weeks in March and April 2020 | 44.5               | 22.7               | 32.8               | –                  | –                  | –                  | 17                                                                                                                                                                           | 52                 | 31                 | 35.4 participants with increased mental stress                                                      |
| Reyes-Olavarra et al.    | Cross-sectional  | 700    | 31 (18-62)                                                       | Chili          | M: 25<br>F: 75     | May and June 2020                          | M: 51.2<br>F: 58.7 | M: 21.5<br>F: 21.4 | M: 27.3<br>F: 19.9 | M: 19.8<br>F: 14.2 | M: 54.6<br>F: 47.7 | M: 25.6<br>F: 38.1 | –                                                                                                                                                                            | –                  | –                  | –                                                                                                   |
| Robinson et al.          | Cross-sectionnal | 2002   | 35 (12.3)                                                        | UK             | M: 38<br>F: 62     | 28th April-22nd May 2020                   | 40                 | 15                 | 45                 | –                  | –                  | –                  | 22.6 less snacking                                                                                                                                                           | 21.7 same snacking | 55.7 more snacking | 58% felt more anxious                                                                               |
| Scarmozzino and Visoli   | Cross-sectional  | 1932   | 63% between 21 and 35<br>21% 36-65<br>14% less than 20 years old | Italy          | M: 33<br>F: 67     | 3 April 2020 to 15 April 2020              | –                  | –                  | –                  | 29.8               | 50.7               | 19.5               | -                                                                                                                                                                            | 47.1               | 52.9               | 42.7% percent of this cohort attributed comfort food increase to higher anxiety levels              |
| Gonzalez-Calderon et al. | Cross-sectional  | 2834   | 41 (10.50)                                                       | Spain          | M: 31<br>F: 69     | 19 May to 31 May 2020                      | M: 63.6<br>F: 57.0 | M: 16.0<br>F: 11.8 | M: 20.5<br>F: 31.3 | M: 28.6<br>F: 21.2 | M: 36<br>F: 36.6   | M: 35.4<br>F: 42.2 | M: 20.1<br>F: 15.5                                                                                                                                                           | M: 41.4<br>F: 38.3 | M: 38.5<br>F46.1   | Anxiety M: 52.9<br>F: 68.1                                                                          |

**Supplementary Table S1.** Non-exhaustive summary of the main dietary and lifestyle behaviors changes related to the lockdown observed worldwide, specific to a single country. *UAE: United Arab Emirates, unis: universities.*
